# Supplementary material for: Change in Collagen Fibril Diameter Distribution of Bovine Anterior Cruciate Ligament upon Injury Can Be Mimicked in a Nanostructured Scaffold
Source: PubMed Central journal article supplement (PMC7956598; doi:10.3390/molecules26051204), 2021-02-24
Supplement: molecules-26-01204-s001.pdf [file molecules-26-01204-s001.pdf]

Table S1. Data for mechanical characterization of ACL

|                      | Thickness<br>mm | Width<br>mm | Area<br>(mm <sup>2</sup> ) | Area<br>(m <sup>2</sup> ) | Length<br>(mm) | Max<br>Load<br>(N) | Max<br>Load<br>(kN) | Ultimate<br>Stress<br>(Mpa) | Ultimate<br>Strain<br>(mm) | Ultimate<br>Strain<br>(%) | Strain @<br>Break<br>(mm) | Strain @<br>Break<br>(%) | Modulus<br>(MPa) | Strain Energy<br>Density<br>(MPa) |
|----------------------|-----------------|-------------|----------------------------|---------------------------|----------------|--------------------|---------------------|-----------------------------|----------------------------|---------------------------|---------------------------|--------------------------|------------------|-----------------------------------|
| <b>Average</b>       | <b>5.2</b>      | <b>13.4</b> | <b>70.9</b>                | <b>0.0</b>                | <b>35.0</b>    | <b>2731.4</b>      | <b>2.7</b>          | <b>41.0</b>                 | <b>21.4</b>                | <b>61.0</b>               | <b>46.8</b>               | <b>133.6</b>             | <b>0.8</b>       | <b>1140.1</b>                     |
| <b>STD</b>           | <b>0.7</b>      | <b>2.7</b>  | <b>20.1</b>                | <b>0.0</b>                | <b>0.9</b>     | <b>484.4</b>       | <b>0.5</b>          | <b>13.3</b>                 | <b>4.3</b>                 | <b>10.8</b>               | <b>7.5</b>                | <b>19.3</b>              | <b>0.3</b>       | <b>288.5</b>                      |
| <b>Outliar Upper</b> | <b>6.4</b>      | <b>17.9</b> | <b>104.0</b>               | <b>0.0</b>                | <b>36.5</b>    | <b>3530.6</b>      | <b>3.5</b>          | <b>62.8</b>                 | <b>28.5</b>                | <b>78.8</b>               | <b>59.1</b>               | <b>165.5</b>             | <b>1.3</b>       | <b>1616.2</b>                     |
| <b>Outliar lower</b> | <b>4.1</b>      | <b>8.9</b>  | <b>37.8</b>                | <b>0.0</b>                | <b>33.4</b>    | <b>1932.2</b>      | <b>1.9</b>          | <b>19.1</b>                 | <b>14.3</b>                | <b>43.1</b>               | <b>34.5</b>               | <b>101.7</b>             | <b>0.3</b>       | <b>664.1</b>                      |
|                      |                 |             |                            |                           |                |                    |                     |                             |                            |                           |                           |                          |                  |                                   |
|                      |                 |             |                            |                           |                |                    |                     |                             |                            |                           |                           |                          |                  |                                   |
|                      |                 |             |                            |                           |                |                    |                     |                             |                            |                           |                           |                          |                  |                                   |
| Joint#2              | 4.51            | 15.65       | 70.60                      | 0.0000706                 | 34.48          | 1925.0             | 1.93                | 27.27                       | 19.00                      | 55.10                     | 50.00                     | 145.01                   | 0.66             | 733                               |
| Joint#3              | 6.15            | 15.96       | 98.10                      | 0.0000981                 | 36.13          | 2900.0             | 2.90                | 29.56                       | 27.00                      | 74.72                     | 57.00                     | 157.75                   | 0.48             | 967                               |
| Joint#4              | 5.77            | 14.14       | 81.58                      | 0.0000816                 | 34.98          | 3225.0             | 3.23                | 39.53                       | 24.00                      | 68.61                     | 48.00                     | 137.22                   | 0.70             | 1207                              |
| Joint#5              | 4.80            | 11.83       | 56.82                      | 0.0000568                 | 35.59          | 2857.0             | 2.86                | 50.28                       | 21.00                      | 59.01                     | 40.00                     | 112.40                   | 0.95             | 1373                              |
| Joint#6              | 4.96            | 9.53        | 47.25                      | 0.0000473                 | 33.70          | 2750.0             | 2.75                | 58.20                       | 16.00                      | 47.48                     | 39.00                     | 115.73                   | 1.28             | 1421                              |

Table S2. Data for mechanical characterization of PCL scaffolds

|                          | Thickness<br>mm | Width<br>mm  | Area<br>(mm <sup>2</sup> ) | Area<br>(m <sup>2</sup> ) | Length<br>(mm) | Max Load<br>(N) | Max Load<br>(kN) | Ultimate<br>Stress<br>(Mpa) | Ultimate<br>Strain<br>(mm) | Ultimate<br>Strain (%) | Strain @<br>Break<br>(mm) | Strain @<br>Break<br>(%) | Modulus<br>(MPa) | Strain Energy<br>Density<br>(MPa) |
|--------------------------|-----------------|--------------|----------------------------|---------------------------|----------------|-----------------|------------------|-----------------------------|----------------------------|------------------------|---------------------------|--------------------------|------------------|-----------------------------------|
| <b>Average-Aligned</b>   | <b>0.077</b>    | <b>10.00</b> | <b>0.77</b>                | <b>0.00</b>               | <b>33.42</b>   | <b>2.93</b>     | <b>0.0029</b>    | <b>3.98</b>                 | <b>12.92</b>               | <b>31.38</b>           | <b>16.80</b>              | <b>40.80</b>             | <b>1.37</b>      | <b>123.58</b>                     |
| <b>STD</b>               | <b>0.025</b>    | <b>0.00</b>  | <b>0.25</b>                | <b>0.00</b>               | <b>3.72</b>    | <b>0.09</b>     | <b>0.0001</b>    | <b>1.36</b>                 | <b>0.84</b>                | <b>2.03</b>            | <b>0.53</b>               | <b>1.29</b>              | <b>0.52</b>      | <b>43.27</b>                      |
| <b>Outlier Upper</b>     | <b>0.117</b>    | <b>10.00</b> | <b>1.17</b>                | <b>0.00</b>               | <b>39.56</b>   | <b>3.08</b>     | <b>0.0031</b>    | <b>6.22</b>                 | <b>14.30</b>               | <b>34.74</b>           | <b>17.68</b>              | <b>42.94</b>             | <b>2.22</b>      | <b>194.98</b>                     |
| <b>Outlier lower</b>     | <b>0.037</b>    | <b>10.00</b> | <b>0.37</b>                | <b>0.00</b>               | <b>27.28</b>   | <b>2.78</b>     | <b>0.0028</b>    | <b>1.74</b>                 | <b>11.54</b>               | <b>28.03</b>           | <b>15.92</b>              | <b>38.67</b>             | <b>0.51</b>      | <b>52.19</b>                      |
|                          |                 |              |                            |                           |                |                 |                  |                             |                            |                        |                           |                          |                  |                                   |
| <b>Average-Unaligned</b> | <b>0.034</b>    | <b>10.00</b> | <b>0.34</b>                | <b>0.00</b>               | <b>29.72</b>   | <b>0.28</b>     | <b>0.0003</b>    | <b>0.88</b>                 | <b>6.26</b>                | <b>17.35</b>           | <b>7.42</b>               | <b>20.47</b>             | <b>0.15</b>      | <b>11.31</b>                      |
| <b>STD</b>               | <b>0.005</b>    | <b>0.00</b>  | <b>0.05</b>                | <b>0.00</b>               | <b>9.24</b>    | <b>0.11</b>     | <b>0.0001</b>    | <b>0.26</b>                 | <b>0.83</b>                | <b>3.15</b>            | <b>0.13</b>               | <b>1.30</b>              | <b>0.10</b>      | <b>3.86</b>                       |
| <b>Outlier Upper</b>     | <b>0.043</b>    | <b>10.00</b> | <b>0.43</b>                | <b>0.00</b>               | <b>44.97</b>   | <b>0.46</b>     | <b>0.0005</b>    | <b>1.30</b>                 | <b>7.62</b>                | <b>22.55</b>           | <b>7.63</b>               | <b>22.61</b>             | <b>0.32</b>      | <b>17.68</b>                      |
| <b>Outlier lower</b>     | <b>0.025</b>    | <b>10.00</b> | <b>0.25</b>                | <b>0.00</b>               | <b>14.47</b>   | <b>0.09</b>     | <b>0.0001</b>    | <b>0.45</b>                 | <b>4.90</b>                | <b>12.15</b>           | <b>7.20</b>               | <b>18.32</b>             | <b>-0.02</b>     | <b>4.94</b>                       |
